# Supplementary material for: Radiative Transfer Model 3.0 integrated into the PALM model system 6.0
Source: Copernicus journal article supplement (doi:10.5194/gmd-14-3095-2021), 2021-05-31
Supplement: Supplementary file [file gmd-14-3095-2021-supplement-title-page.pdf › gmd-14-3095-2021-supplement-title-page.pdf]

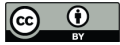

## *Supplement of*

# **Radiative Transfer Model 3.0 integrated into the PALM model system 6.0**

**Pavel Krč et al.**

*Correspondence to:* Pavel Krč (krc@cs.cas.cz)

- gmd-14-3095-2021-supplement-title-page.pdf
- source
  - biometeorology\_mod.f90
  - land\_surface\_model\_mod.f90
  - plant\_canopy\_model\_mod.f90
  - radiation\_model\_mod.f90
  - urban\_surface\_mod.f90
- supplements.pdf

The copyright of individual parts of the supplement might differ from the article licence.
